# Supplementary material
Source: PubMed Central journal article supplement (PMC1735297)
Supplement: jmedgene_40_10_787__1.pdf [file jmedgene_40_10_787__1.pdf]

|                       | Israeli Prostate Study |             | WAS*        |             | OR           | 95% CI           |
|-----------------------|------------------------|-------------|-------------|-------------|--------------|------------------|
| Mutation              | N                      | %           | N           | %           |              |                  |
| <i>BRCA1</i>          |                        |             |             |             |              |                  |
| 185delAG              | 14                     | 1.49        | 6           | 0.7         | 2.18         | 0.78-6.96        |
| 5382insC              | 2                      | 0.21        | 2           | 0.2         | 0.93         | 0.07-12.82       |
| <i>BRCA2</i>          |                        |             |             |             |              |                  |
| 6174delT              | 14                     | 1.49        | 5           | 0.6         | 2.62         | 0.89-9.34        |
| <b>Total Positive</b> | <b>30</b>              | <b>3.19</b> | <b>13</b>   | <b>1.49</b> | <b>2.18†</b> | <b>1.09-4.43</b> |
| <b>Total</b>          | <b>940</b>             |             | <b>872</b>  |             |              |                  |
|                       | Israeli Prostate Study |             | MECC*       |             | OR           | 95% CI           |
| Mutation              | N                      | %           | N           | %           |              |                  |
| <i>BRCA1</i>          |                        |             |             |             |              |                  |
| 185delAG              | 14                     | 1.49        | 2           | 0.42        | 3.55         | 0.80-15.70       |
| 5382insC              | 2                      | 0.21        | 1           | 0.21        | 1.00         | 0.09-11.1        |
| <i>BRCA2</i>          |                        |             |             |             |              |                  |
| 6174delT              | 14                     | 1.49        | 5           | 1.06        | 1.41         | 0.50-3.94        |
| <b>Total Positive</b> | <b>30</b>              | <b>3.19</b> | <b>8</b>    | <b>1.69</b> | <b>1.91</b>  | <b>0.87-4.20</b> |
| <b>Total</b>          | <b>940</b>             |             | <b>472</b>  |             |              |                  |
|                       | Israeli Prostate Study |             | WAS + MECC* |             | OR           | 95% CI           |
| Mutation              | N                      | %           | N           | %           |              |                  |
| <i>BRCA1</i>          |                        |             |             |             |              |                  |
| 185delAG              | 14                     | 1.49        | 8           | 0.59        | 2.52         | 1.05-6.04        |
| 5382insC              | 2                      | 0.21        | 3           | 0.22        | 0.95         | 0.16-5.72        |
| <i>BRCA2</i>          |                        |             |             |             |              |                  |
| 6174delT              | 14                     | 1.49        | 10          | 0.74        | 2.02         | 0.89-4.56        |
| <b>Total Positive</b> | <b>30</b>              | <b>3.19</b> | <b>21</b>   | <b>1.56</b> | <b>2.08†</b> | <b>1.18-3.65</b> |
| <b>Total</b>          | <b>940</b>             |             | <b>1344</b> |             |              |                  |

\*Ashkenazi Jewish male controls 50 years and above without history of prostate cancer.

†p<0.05
